# Supplementary material
Source: PubMed Central journal article supplement (PMC8597016)
Supplement: NIHMS1682719-supplement-Supplementary_Information.pdf [file NIHMS1682719-supplement-Supplementary_Information.pdf]

**Supplementary Table 4, Related to Methods. Reagents and Resources.**

| REAGENT or RESOURCE                                                               | SOURCE                                | IDENTIFIER |
|-----------------------------------------------------------------------------------|---------------------------------------|------------|
| <b>Antibodies</b>                                                                 |                                       |            |
| mouse anti-His tag                                                                | Cell Sciences                         | CSI20563B  |
| rabbit anti-HVCN1                                                                 | Aviva Systems Biology                 | OAPB01154  |
| rabbit anti-HVCN1                                                                 | Alomone Labs                          | AHC-001    |
| rabbit anti-HVCN1                                                                 | Invitrogen (Thermo Fisher Scientific) | PA5-24964  |
| mouse anti- $\beta$ -Actin                                                        | Cell Signaling Technology             | 8H10D10    |
| mouse PE/Cy7 anti-human CD19                                                      | BioLegend                             | 302215     |
| mouse FITC anti-human CD3                                                         | BioLegend                             | 300406     |
| mouse Alexa Fluor® 700 anti-human CD14                                            | BioLegend                             | 325614     |
| mouse PE anti-human CD4                                                           | BioLegend                             | 317410     |
| mouse APC anti-human CD8a                                                         | BioLegend                             | 300912     |
| mouse APC anti-human CD11b                                                        | BioLegend                             | 301310     |
| mouse Alexa Fluor® 700 anti-mouse/human CD11b                                     | BioLegend                             | 101222     |
| PE/Cy7 Mouse IgG1, $\kappa$ Isotype Ctrl Antibody                                 | BioLegend                             | 400126     |
| FITC Mouse IgG1, $\kappa$ Isotype Ctrl Antibody                                   | BioLegend                             | 400108     |
| Alexa Fluor® 700 Mouse IgG1, $\kappa$ Isotype Ctrl Antibody                       | BioLegend                             | 400143     |
| PE Mouse IgG1, $\kappa$ Isotype Ctrl Antibody                                     | BioLegend                             | 400111     |
| APC Mouse IgG1, $\kappa$ Isotype Ctrl Antibody                                    | BioLegend                             | 400120     |
| Goat anti-Mouse IgG (H+L) Cross-Adsorbed Secondary Antibody, Alexa Fluor 680      | Invitrogen                            | A-21057    |
| Goat anti-Rabbit IgG (H+L) Cross-Adsorbed Secondary Antibody, Alexa Fluor 680     | Invitrogen                            | A-21076    |
| mouse anti-CC30 LukAB                                                             | This study, Envigo Inc.               | N/A        |
| <b>Bacterial and Virus Strains</b>                                                |                                       |            |
| <i>E. coli</i> Endura ElectroCompetent cells                                      | Lucigen                               | 60242      |
| <i>E. coli</i> IM30B                                                              | 1                                     | VJT 48.100 |
| <i>E. coli</i> T7 LysY/LacQ                                                       | NEB                                   | C3013I     |
| <i>E. coli</i> OverExpress C43(DE3) Chemically Competent Cells                    | Lucigen                               | 60446-1    |
| <i>S. aureus</i> 62300D1 (CC30)                                                   | 2                                     | VJT 48.91  |
| <i>S. aureus</i> 62300D1 $\Delta$ lukAB                                           | This study                            | VJT 61.87  |
| <i>S. aureus</i> MUZ211 (CC30)                                                    | 3                                     | VJT 48.94  |
| <i>S. aureus</i> RN4220                                                           | 4                                     | VJT 2.60   |
| <i>S. aureus</i> Newman (CC8)                                                     | 5                                     | VJT 2.97   |
| <i>S. aureus</i> Newman $\Delta\Delta\Delta$                                      | 6                                     | VJT 31.58  |
| <i>S. aureus</i> MW2 (CC1)                                                        | 7                                     | VJT 4.79   |
| <i>S. aureus</i> Mu50 (CC5)                                                       | 8                                     | VJT 15.52  |
| <i>S. aureus</i> Clinical isolate # 52 (CC8)                                      | 9                                     | VJT 38.21  |
| <i>S. aureus</i> MRSA252 (CC30)                                                   | 10                                    | VJT 21.18  |
| <i>S. aureus</i> Clinical isolate # 33 (CC45)                                     | 9                                     | VJT 38.08  |
| <i>S. aureus</i> BVED 022 (CC398)                                                 | This study                            | VJT 46.40  |
| <i>S. aureus</i> Newman $\Delta\Delta\Delta$ pOS1_PlukAB-lukAs.s.-6xHis-CC1 LukAB | This study                            | VJT 46.29  |

|                                                                                                            |                                     |            |
|------------------------------------------------------------------------------------------------------------|-------------------------------------|------------|
| <i>S. aureus</i> Newman $\Delta\Delta\Delta\Delta$ pOS1_PlukAB-lukAs.s.-6xHis-CC5 LukAB                    | This study                          | VJT 46.35  |
| <i>S. aureus</i> Newman $\Delta\Delta\Delta\Delta$ pOS1_PlukAB-lukAs.s.-6xHis-CC8 LukAB                    | <sup>11</sup>                       | VJT 46.28  |
| <i>S. aureus</i> Newman $\Delta\Delta\Delta\Delta$ pOS1_PlukAB-lukAs.s.-6xHis-CC30 LukAB                   | This study                          | VJT 46.19  |
| <i>S. aureus</i> Newman $\Delta\Delta\Delta\Delta$ pOS1_PlukAB-lukAs.s.-6xHis-CC45 LukAB                   | This study                          | VJT 46.33  |
| <i>S. aureus</i> Newman $\Delta\Delta\Delta\Delta$ pOS1_PlukAB-lukAs.s.-6xHis-CC75 LukAB                   | This study                          | VJT 47.16  |
| <i>S. aureus</i> Newman $\Delta\Delta\Delta\Delta$ pOS1_PlukAB-lukAs.s.-6xHis-CC398 LukAB                  | This study                          | VJT 46.54  |
| <i>S. aureus</i> Newman $\Delta\Delta\Delta\Delta$ pOS1_PlukAB-lukAs.s.-6xHis- <i>S. schweitzeri</i> LukAB | This study                          | VJT 48.11  |
| <i>S. aureus</i> Newman $\Delta\Delta\Delta\Delta$ pOS1_PlukAB-lukAs.s.-6xHis-LukE                         | <sup>6</sup>                        | VJT 37.02  |
| <i>S. aureus</i> Newman $\Delta\Delta\Delta\Delta$ pOS1_PlukAB-lukAs.s.-6xHis-LukD                         | <sup>6</sup>                        | VJT 37.31  |
| <i>S. aureus</i> Newman $\Delta\Delta\Delta\Delta$ pOS1_PlukAB-lukAs.s.-6xHis-HlgA                         | <sup>6</sup>                        | VJT 40.67  |
| <i>S. aureus</i> Newman $\Delta\Delta\Delta\Delta$ pOS1_PlukAB-lukAs.s.-6xHis-HlgB                         | <sup>6</sup>                        | VJT 37.37  |
| <i>S. aureus</i> Newman $\Delta\Delta\Delta\Delta$ pOS1_PlukAB-lukAs.s.-6xHis-LukS                         | <sup>6</sup>                        | VJT 37.05  |
| <i>S. aureus</i> Newman $\Delta\Delta\Delta\Delta$ pOS1_PlukAB-lukAs.s.-6xHis-LukF                         | <sup>6</sup>                        | VJT 37.34  |
| <i>S. aureus</i> USA300 LAC $\Delta$ lukAB                                                                 | <sup>12</sup>                       | VJT 14.26  |
| <b>Biological Samples</b>                                                                                  |                                     |            |
| Human blood samples were obtained as buffy coats from healthy, anonymous, consenting adult donors          | New York Blood Center               | N/A        |
| <b>Chemicals, Peptides, and Recombinant Proteins</b>                                                       |                                     |            |
| GM-CSF (Leukine (250 mg GM-CSF))                                                                           | NYU Langone Medical Center Pharmacy | N/A        |
| Human IL-4 Carrier-Free Recombinant Protein, eBioscience                                                   | Invitrogen                          | 34-8049-82 |
| Purified recombinant LukED, HlgAB, and LukAB variants                                                      | This study                          | N/A        |
| Blasticidin                                                                                                | Invivogen                           | ant-bl-05  |
| Puromycin                                                                                                  | Invivogen                           | ant-pr-1   |
| Polybrene Infection/Transfection Reagent                                                                   | Millipore                           | TR-1003-G  |
| X-tremeGENE 9 DNA Transfection Reagent                                                                     | Roche                               | XTG9-RO    |
| Accumax Cell Dissociation Solution                                                                         | Innovative Cell Technologies        | AM105      |
| eBioscience™ Fixable Viability Dye eFluor™ 450                                                             | Invitrogen                          | 65-0863-14 |
| HRP Streptavidin                                                                                           | BioLegend                           | 405210     |
| EZ-Link™ NHS-PEG4-Biotin, No-Weigh™ Format                                                                 | Thermo Scientific                   | 21329      |
| Gateway™ BP Clonase™ II Enzyme mix                                                                         | Invitrogen                          | 11789020   |
| Gateway™ LR Clonase™ II Enzyme mix                                                                         | Invitrogen                          | 11791020   |

|                                                                   |                                       |             |
|-------------------------------------------------------------------|---------------------------------------|-------------|
| Propidium Iodide Solution                                         | G-biosciences                         | 786-1272    |
| NucBlue™ Live ReadyProbes™ Reagent (Hoechst 33342)                | Thermo Fisher Scientific              | R37605      |
| <b>Critical Commercial Assays</b>                                 |                                       |             |
| CytoTox-ONE™ Homogeneous Membrane Integrity Assay                 | Promega                               | G7890       |
| CellTiter 96® AQueous One Solution Cell Proliferation Assay (MTS) | Promega                               | G3580       |
| EasySep™ Human CD4+ T Cell Isolation Kit                          | StemCell Technologies                 | 17952       |
| EasySep™ Human CD8+ T Cell Isolation Kit                          | StemCell Technologies                 | 17953       |
| EasySep™ Human B Cell Isolation Kit                               | StemCell Technologies                 | 17954       |
| CD14 MicroBeads                                                   | Miltenyi Biotec                       | 130-050-201 |
| Pierce™ BCA Protein Assay Kit                                     | Thermo Scientific                     | 23225       |
| SYPRO™ Ruby Protein Gel Stain                                     | Invitrogen (Thermo Fisher Scientific) | S12001      |
| Deposited Data                                                    |                                       |             |
|                                                                   |                                       |             |
| <b>Experimental Models: Cell Lines</b>                            |                                       |             |
| THP1                                                              | ATCC                                  | TIB-202     |
| THP1 scramble shRNA                                               | This study                            | N/A         |
| THP1 <i>ITGAM</i> shRNA                                           | This study                            | N/A         |
| THP1 <i>ITGAM</i> shRNA, non-targeting sgRNA                      | This study                            | N/A         |
| THP1 <i>ITGAM</i> shRNA, <i>HVCN1</i> sgRNA (1)                   | This study                            | N/A         |
| THP1 <i>ITGAM</i> shRNA, <i>HVCN1</i> sgRNA (2)                   | This study                            | N/A         |
| THP1 <i>ITGAM</i> shRNA, <i>OGT</i> sgRNA                         | This study                            | N/A         |
| THP1 <i>ITGAM</i> shRNA, <i>ASGR1</i> sgRNA                       | This study                            | N/A         |
| THP1 <i>ITGAM</i> shRNA, GECKO-libA                               | This study                            | N/A         |
| THP1 <i>ITGAM</i> shRNA, GECKO-libB                               | This study                            | N/A         |
| HL60                                                              | ATCC                                  | CCL-240     |
| HL60 scramble shRNA                                               | <sup>13</sup>                         | N/A         |
| HL60 <i>ITGAM</i> shRNA                                           | <sup>13</sup>                         | N/A         |
| HL60 <i>CD18</i> shRNA                                            | <sup>13</sup>                         | N/A         |
| CD18 CHO-K1                                                       | <sup>14</sup>                         | N/A         |
| CD18 CHO-K1 Fluc                                                  | This study                            | N/A         |
| CD18 CHO-K1 <i>HVCN1</i>                                          | This study                            | N/A         |
| CD18 CHO-K1 m <i>HVCN1</i>                                        | This study                            | N/A         |
| Lenti-X 293T                                                      | Takara Bio USA                        | 632180      |
| <b>Experimental Models: Organisms/Strains</b>                     |                                       |             |
| Mouse: WT C57BL/6 mice                                            | The Jackson Laboratory                |             |
| Mouse: h <i>HVCN1</i> C57BL/6 mice                                | This study                            |             |
| Mouse: CD-1                                                       | Charles River Laboratories            |             |

| <b>Oligonucleotides</b>                                                                                |                                                           |                        |
|--------------------------------------------------------------------------------------------------------|-----------------------------------------------------------|------------------------|
| Primers used in this study, see Supplementary Table 5                                                  | see Supplementary Table 5                                 | N/A                    |
| <b>Recombinant DNA</b>                                                                                 |                                                           |                        |
| pIMAY                                                                                                  | 15                                                        | N/A                    |
| pIMAY-CC30-LukAB-Kan                                                                                   | This study                                                | N/A                    |
| pLenti CMV Puro DEST (w118-1)                                                                          | Was a gift from Eric Campeau & Paul Kaufman <sup>16</sup> | Addgene plasmid #17452 |
| pDONR221 (Gateway Donor vector used to generate pENTR clones)                                          | Thermo Fisher Scientific                                  | 12536017               |
| pENTR221 Fluc (Gateway-compatible plasmid encoding firefly luciferase (Fluc))                          | Gift from John Schoggins (UTSW) <sup>17</sup>             | N/A                    |
| pENTR221 human HVCN1 (Gateway-compatible plasmid encoding <i>HVCN1</i> )                               | Ultimate ORF Clones (Thermo Fisher Scientific)            | N/A                    |
| pCMV-SPORT6 mHVCN1 (Used to amplify <i>Hvcn1</i> gene)                                                 | Dharmacon (Horizon Inspired Cell Technologies)            | Clone ID: 4913027      |
| pENTR211 mHVCN1 (Gateway-compatible plasmid encoding <i>Hvnc1</i> )                                    | This study                                                | N/A                    |
| pLenti CMV Puro Fluc (Used to generate stable cell lines expressing firefly luciferase (control gene)) | This study                                                | N/A                    |
| pLenti CMV Puro human HVCN1 (Used to generate stable cell lines expressing <i>HVCN1</i> )              | This study                                                | N/A                    |
| pLenti CMV Puro mHVCN1 (Used to generate stable cell lines expressing <i>Hvcn1</i> )                   | This study                                                | N/A                    |
| pCMV6-AC-GFP-HVCN1-WT                                                                                  | OriGene                                                   | RG202323               |
| pCMV6-AC-GFP-mHVCN1-WT                                                                                 | This study                                                | N/A                    |
| pCMV6-AC-GFP-mHVCN1-hEC1 (amino acids 118-134 replaced with LDLKIIQPDKNYYAAMV)                         | This study                                                | N/A                    |
| pCMV6-AC-GFP-mHVCN1-hEC2 (amino acids 187-193 replaced with QEHQFEA)                                   | This study                                                | N/A                    |
| pOS1_PlukAB-lukAs.s.-6xHis                                                                             | 18                                                        | N/A                    |
| pOS1_PlukAB-lukAs.s.-6xHis-CC1 LukAB                                                                   | This study                                                | N/A                    |
| pOS1_PlukAB-lukAs.s.-6xHis-CC5 LukAB                                                                   | This study                                                | N/A                    |
| pOS1_PlukAB-lukAs.s.-6xHis-CC8 LukAB                                                                   | This study                                                | N/A                    |
| pOS1_PlukAB-lukAs.s.-6xHis-CC30 LukAB                                                                  | This study                                                | N/A                    |
| pOS1_PlukAB-lukAs.s.-6xHis-CC45 LukAB                                                                  | This study                                                | N/A                    |
| pOS1_PlukAB-lukAs.s.-6xHis-CC75 LukAB                                                                  | This study                                                | N/A                    |
| pOS1_PlukAB-lukAs.s.-6xHis-CC398 LukAB                                                                 | This study                                                | N/A                    |
| pOS1_PlukAB-lukAs.s.-6xHis- <i>S. schweitzeri</i> LukAB                                                | This study                                                | N/A                    |
| pOS1_PlukAB-lukAs.s.-6xHis-LukE                                                                        | 6                                                         | N/A                    |
| pOS1_PlukAB-lukAs.s.-6xHis-LukD                                                                        | 6                                                         | N/A                    |
| pOS1_PlukAB-lukAs.s.-6xHis-HlgA                                                                        | 6                                                         | N/A                    |
| pOS1_PlukAB-lukAs.s.-6xHis-HlgB                                                                        | 6                                                         | N/A                    |
| pOS1_PlukAB-lukAs.s.-6xHis-LukS                                                                        | 6                                                         | N/A                    |
| pOS1_PlukAB-lukAs.s.-6xHis-LukF                                                                        | 6                                                         | N/A                    |
| pCMV-Gag-pol                                                                                           | Was a gift from Charles Rice                              | N/A                    |

|                                                       |                                                                                       |                        |
|-------------------------------------------------------|---------------------------------------------------------------------------------------|------------------------|
| pCMV-VSVg                                             | Was a gift from Charles Rice                                                          | N/A                    |
| pLKO.1-blast                                          | Was a gift from Keith Mostov <sup>19</sup>                                            | Addgene plasmid #26655 |
| pLKO.1-blast-SCRAMBLE                                 | Was a gift from Keith Mostov <sup>19</sup>                                            | Addgene plasmid #26701 |
| pLKO.1-blast-CD11b                                    | This study                                                                            | N/A                    |
| pLKO.1 puromycin SCRAMBLE                             | <sup>13</sup>                                                                         | N/A                    |
| pLKO.1 puromycin CD11b                                | <sup>13</sup>                                                                         | N/A                    |
| pLKO.1 puromycin CD18                                 | <sup>13</sup>                                                                         | N/A                    |
| pLentiCRISPRv2                                        | Was a gift from Feng Zhang <sup>20</sup>                                              | Addgene plasmid #52961 |
| pLentiCRISPR_non targeting                            | This study                                                                            | N/A                    |
| pLentiCRISPR_Hvcn1(1)                                 | This study                                                                            | N/A                    |
| pLentiCRISPR_Hvcn1(2)                                 | This study                                                                            | N/A                    |
| pLentiCRISPR_OGT                                      | This study                                                                            | N/A                    |
| pLentiCRISPR_ASGR1                                    | This study                                                                            | N/A                    |
| pLentiCRISPR_GeCKO-libA                               | Human GeCKOv2 CRISPR knockout pooled library was a gift from Feng Zhang <sup>20</sup> | Addgene #1000000048    |
| pLentiCRISPR_GeCKO-libB                               | Human GeCKOv2 CRISPR knockout pooled library was a gift from Feng Zhang <sup>20</sup> | Addgene #1000000049    |
| pET15b-6xHis-human CD11b I domain-Flag                | <sup>13</sup>                                                                         | N/A                    |
| pET-24a(+)                                            | MilliporeSigma                                                                        | 69749-3                |
| pET-24a(+)-HVCN1 Strep                                | This study                                                                            | N/A                    |
| <b>Software and Algorithms</b>                        |                                                                                       |                        |
| FlowJo (version 10.7.1)                               | BD Life Sciences                                                                      | N/A                    |
| GraphPad Prism 8                                      | GraphPad Software                                                                     | N/A                    |
| HCS Studio software                                   | Thermo Fisher Scientific                                                              | N/A                    |
| MegAlign                                              | DNASar                                                                                | N/A                    |
| ImageJ 1.51s                                          | <a href="https://imagej.nih.gov/">https://imagej.nih.gov/</a>                         | N/A                    |
| <b>Other</b>                                          |                                                                                       |                        |
| CellInsight CX7 High-Content Screening (HCS) Platform | Thermo Fisher Scientific                                                              | N/A                    |
| autoMACS Pro Separator                                | Miltenyi Biotec                                                                       | N/A                    |
| Octet RED96E System                                   | Pall ForteBio                                                                         | N/A                    |
| AKTA Pure FLPC                                        | GE Healthcare                                                                         | N/A                    |

**Supplementary Table 5, Related to Methods. Oligonucleotides used in this study.**

| <b>Label</b> | <b>Description</b>                                       | <b>Sequence</b>                                             |
|--------------|----------------------------------------------------------|-------------------------------------------------------------|
| VJT1816      | attB- <i>Hvcn1</i> -Forw                                 | GGGGACAAGTTTGTACAAAAAAGCAGGCTT<br>CACCATGACTTCCCATGACCCAAAG |
| VJT1817      | attB- <i>Hvcn1</i> -Rev                                  | GGGGACCACTTTGTACAAGAAAGCTGGGTC<br>TAGTTCACGTCCCCGAGAAG      |
| VJT1878      | KpnI-upstream-MRSA252<br><i>lukAB</i> -Forw              | ATGCGGTACCTTTCAGTTTGTAGTTCAACAA<br>TATCTG                   |
| VJT1879      | upstream-MRSA252 <i>lukAB</i> -<br>Rev                   | TACGCGCTTTTTATTTTTCATTG                                     |
| VJT1880      | downstream-MRSA252<br><i>lukAB</i> -Forw                 | TAAGTTTTCGCAAGTTGCCTG                                       |
| VJT1881      | downstream-MRSA252<br><i>lukAB</i> - <i>SacI</i> -Rev    | ATGCGAGCTCTGCAGGTCATAATAGCACAT<br>GG                        |
| VJT1882      | upstream-MRSA252 <i>lukAB</i><br>overlap-aphA-3-Forw     | CAATGAAAATAAAAAGCGCGTACTCGACGA<br>TAAACCCAGCGAAC            |
| VJT1883      | downstream-MRSA252<br><i>lukAB</i> overlap-aphA-3-Rev    | CAGGCAACTTGCGAAAATTACTTTTTAGAC<br>ATCTAAATCTAGGTAC          |
| VJT544       | <i>Bam</i> HI- <i>lukAB</i> -Forw                        | CCCGGATCCCATAAAGACTCTCAAGACCAA<br>AAT                       |
| VJT543       | <i>lukAB</i> - <i>Pst</i> I-Rev                          | CCCCTGCAGTTATTTCTTTTCATTATCATTAA<br>GTAC                    |
| VJT1331      | <i>Bam</i> HI-MRSA252 <i>lukAB</i> -<br>Forw             | CCCGGATCCAATAAAGACTCACAAGACCAA<br>ACT                       |
| VJT628       | MRSA252 <i>lukAB</i> - <i>Pst</i> I-Rev                  | CCCCTGCAGTTATTTCTGTTCTTTATCATTAA<br>TTG                     |
| VJT1415      | BVED 022 <i>lukAB</i> - <i>Pst</i> I-Rev                 | CCCCTGCAGTTATTTCTGTTCTTTATCATTAA<br>GTA                     |
| VJT1399      | clinical isolate # 33 <i>lukAB</i> -<br><i>Nhe</i> I-Rev | CCCGCTAGCTTATTTCTTTTCTTTATCATTAA<br>ATG                     |
| VJT1759      | Oligo1-HVCN1-<br>HGLibB_22402                            | CACCGTGGGAGACGACTACCATGCC                                   |
| VJT1760      | Oligo2-HVCN1-<br>HGLibB_22402                            | AAACGGCATGGTAGTCGTCTCCCAC                                   |
| VJT1761      | Oligo1-HVCN1-<br>HGLibB_22403                            | CACCGCAGTTAAGACACGTTTCAGAA                                  |
| VJT1762      | Oligo2-HVCN1-<br>HGLibB_22403                            | AAACTTCTGAACGTGTCTTAACTGC                                   |
| VJT1769      | Oligo1-OGT-HGLibA_33329                                  | CACCGTGGCTTCTTCCAAGCGACCC                                   |
| VJT1770      | Oligo2-OGT-HGLibA_33329                                  | AAACGGGTCGCTTGGAAGAAGCCAC                                   |
| VJT1767      | Oligo1-ASGR1-<br>HGLibA_03287                            | CACCGGGGTGCTCAAGCCCTTGACC                                   |
| VJT1768      | Oligo2-ASGR1-<br>HGLibA_03287                            | AAACGGTCAAGGGCTTGAGCACCCC                                   |
| VJT1775      | Oligo1-nt-HGLibA_64423                                   | CACCGACATAGTCGACGGCTCGATT                                   |
| VJT1776      | Oligo2-nt-HGLibA_64423                                   | AAACAATCGAGCCGTCGACTATGTC                                   |
| VJT1627      | v2Adaptor_F                                              | AATGGACTATCATATGCTTACCGTAACTTGA<br>AAGTATTTTCG              |

|                           |                                                                  |                                                                                                                                                                                                                                                                                                                                                                                                                                                                                                                                                                                                                                                                                                                                                                                                                                                                                                                                                                                                                                                                    |
|---------------------------|------------------------------------------------------------------|--------------------------------------------------------------------------------------------------------------------------------------------------------------------------------------------------------------------------------------------------------------------------------------------------------------------------------------------------------------------------------------------------------------------------------------------------------------------------------------------------------------------------------------------------------------------------------------------------------------------------------------------------------------------------------------------------------------------------------------------------------------------------------------------------------------------------------------------------------------------------------------------------------------------------------------------------------------------------------------------------------------------------------------------------------------------|
| VJT1628                   | v2Adaptor_R                                                      | TCTACTATTCTTTCCCCTGCACTGTTGTGGG<br>CGATGTGCGCTCTG                                                                                                                                                                                                                                                                                                                                                                                                                                                                                                                                                                                                                                                                                                                                                                                                                                                                                                                                                                                                                  |
| VJT1667                   | R_universal                                                      | CAAGCAGAAGACGGCATAACGAGATGTGACT<br>GGAGTTCAGACGTGTGCTCTTCCGATCTTCT<br>ACTATTCTTTCCCCTGCACTGT                                                                                                                                                                                                                                                                                                                                                                                                                                                                                                                                                                                                                                                                                                                                                                                                                                                                                                                                                                       |
| VJT1663                   | F09                                                              | AATGATACGGCGACCACCGAGATCTACACT<br>CTTTCCCTACACGACGCTCTTCCGATCTacga<br>tcgatAGGTAAGGtcttgtggaaaggacgaaacaccg                                                                                                                                                                                                                                                                                                                                                                                                                                                                                                                                                                                                                                                                                                                                                                                                                                                                                                                                                        |
| VJT1664                   | F10                                                              | AATGATACGGCGACCACCGAGATCTACACT<br>CTTTCCCTACACGACGCTCTTCCGATCTtAA<br>CAATGGtcttgtggaaaggacgaaacaccg                                                                                                                                                                                                                                                                                                                                                                                                                                                                                                                                                                                                                                                                                                                                                                                                                                                                                                                                                                |
| VJT1665                   | F11                                                              | AATGATACGGCGACCACCGAGATCTACACT<br>CTTTCCCTACACGACGCTCTTCCGATCTatAC<br>TGTATCtcttgtggaaaggacgaaacaccg                                                                                                                                                                                                                                                                                                                                                                                                                                                                                                                                                                                                                                                                                                                                                                                                                                                                                                                                                               |
| VJT1666                   | F12                                                              | AATGATACGGCGACCACCGAGATCTACACT<br>CTTTCCCTACACGACGCTCTTCCGATCTgatA<br>GGTCGCAtcttgtggaaaggacgaaacaccg                                                                                                                                                                                                                                                                                                                                                                                                                                                                                                                                                                                                                                                                                                                                                                                                                                                                                                                                                              |
| VJT2065                   | HVCN1_F6                                                         | tatgtgtgtcgttcttactca                                                                                                                                                                                                                                                                                                                                                                                                                                                                                                                                                                                                                                                                                                                                                                                                                                                                                                                                                                                                                                              |
| VJT2069                   | HVCN1_R6                                                         | caacatgaagaagaccaggatg                                                                                                                                                                                                                                                                                                                                                                                                                                                                                                                                                                                                                                                                                                                                                                                                                                                                                                                                                                                                                                             |
| VJT2681                   | HVCN1_F12                                                        | TGTGTCACACCCTAGGACGA                                                                                                                                                                                                                                                                                                                                                                                                                                                                                                                                                                                                                                                                                                                                                                                                                                                                                                                                                                                                                                               |
| VJT2683                   | HVCN1_R12                                                        | GCCGTGCCACACCTAAACAT                                                                                                                                                                                                                                                                                                                                                                                                                                                                                                                                                                                                                                                                                                                                                                                                                                                                                                                                                                                                                                               |
| VJT2845                   | hHVCN1_F1                                                        | TCCGTGTGAATAGCACTGGC                                                                                                                                                                                                                                                                                                                                                                                                                                                                                                                                                                                                                                                                                                                                                                                                                                                                                                                                                                                                                                               |
| VJT2846                   | hHVCN1_R1                                                        | GCTGGGCAAACACTCGTAGA                                                                                                                                                                                                                                                                                                                                                                                                                                                                                                                                                                                                                                                                                                                                                                                                                                                                                                                                                                                                                                               |
| hHVCN1<br>template<br>DNA | DNA template synthesized<br>as GeneFragment by Gene<br>Universal | ccccAATTCCTCCCCTCTCCAGGAGAACCC<br>TGCCTTCTCCCCCTTTCCCCTGACTATGCAG<br>GGTGGATGTGTCACACCCTAGGACGAGCTT<br>AGCCCACTGGGCGAGAACACCGCCACCTCA<br>CTCCCTGAGGACAGGCAGCCTTTGCAGGGA<br>GGGGTATGTGTGTCGTCTTGTACTCAGAGT<br>CCCAAGGCTGGGGTGTGTTGAATATCTTATT<br>GAGCATCTGTTCTGCAGATGAACCACAGAG<br>AGAGAAAAGGAGACTTAAACTCTATATGCC<br>TTTTGAGAGTGGCATTGCTTTGAGAGCTGG<br>TAATAAGAGAAACAGACTGGGTGGCTAGGG<br>aACAGGGAGTGAGAGAGACTCCCCGAGCTC<br>CCCACAGGGCACTGAGGGTTCCAGAGAAT<br>GGAGGAGGCCCTGCCGTGCACTCAGAGCC<br>TCTTGCTCCTCCCTCCAGGTCATCATATaT<br>GCCTGGTGGTCCCTGGACGCCCTCCTCGTGC<br>TTGCTGAACTCCTCCTGGATTTGAAGATCAT<br>CcAGCCGGACaAGaAtaACTATGCGGcCaTGG<br>TACGAACAGGGCACGCACACAGTGAATTGA<br>GCTGCAGCTCCAGGCCAtcttttttttaagattatt<br>atttattatatacagttacactgtagctgtcttcagacactccagga<br>gatggagtcagatattgttacagatggtgtgagccaccatgtggt<br>tgctgggaattgaactcaggaccttgaagagcagtcoggtgctc<br>ttaaccactgagccattactccagccccCCAGGCCATCttt<br>tttgtttgtttgtttttgagacagggtttctctgttagccctgctgtt<br>ctggaactcactttgttagaccaggctggcctcaaactcagaaat<br>ccacctgcctctgcctcccagtggtgggattaaggcgtgccc |

|  |  |                                                                                                                    |
|--|--|--------------------------------------------------------------------------------------------------------------------|
|  |  | acctgtagcccaggaagtctggaatttgatcctcctgcctcagct<br>tccgaagtgctgggatgatagCCAGGCCTGGCCAGA<br>GATGTTTAGGTGTGGCACGGCCTGA |
|--|--|--------------------------------------------------------------------------------------------------------------------|

## Supplementary References.

- 1 Monk, I. R., Tree, J. J., Howden, B. P., Stinear, T. P. & Foster, T. J. Complete Bypass of Restriction Systems for Major *Staphylococcus aureus* Lineages. *MBio* **6**, e00308-00315, doi:10.1128/mBio.00308-15 (2015).
- 2 Pelzek, A. J. *et al.* Human Memory B Cells Targeting *Staphylococcus aureus* Exotoxins Are Prevalent with Skin and Soft Tissue Infection. *mBio* **9**, doi:10.1128/mBio.02125-17 (2018).
- 3 Smyth, D. S. *et al.* Nasal carriage as a source of agr-defective *Staphylococcus aureus* bacteremia. *J Infect Dis* **206**, 1168-1177, doi:10.1093/infdis/jis483 (2012).
- 4 Novick, R. P. Genetic systems in staphylococci. *Methods Enzymol.* **204**, 587-636 (1991).
- 5 Duthie, E. S. & Lorenz, L. L. Staphylococcal coagulase; mode of action and antigenicity. *J Gen Microbiol* **6**, 95-107 (1952).
- 6 Reyes-Robles, T., Lubkin, A., Alonzo, F., 3rd, Lacy, D. B. & Torres, V. J. Exploiting dominant-negative toxins to combat *Staphylococcus aureus* pathogenesis. *EMBO Rep* **17**, 780, doi:10.15252/embr.201670010 (2016).
- 7 Centers for Disease, C. & Prevention. Four pediatric deaths from community-acquired methicillin-resistant *Staphylococcus aureus* - Minnesota and North Dakota, 1997-1999. *MMWR. Morbidity and mortality weekly report* **48**, 707-710 (1999).
- 8 Hiramatsu, K. *et al.* Methicillin-resistant *Staphylococcus aureus* clinical strain with reduced vancomycin susceptibility. *The Journal of antimicrobial chemotherapy* **40**, 135-136 (1997).
- 9 Thomsen, I. P. *et al.* Children with invasive *Staphylococcus aureus* disease exhibit a potentially neutralizing antibody response to the cytotoxin LukAB. *Infection and immunity* **82**, 1234-1242, doi:10.1128/IAI.01558-13 (2014).
- 10 Holden, M. T. *et al.* Complete genomes of two clinical *Staphylococcus aureus* strains: evidence for the rapid evolution of virulence and drug resistance. *Proceedings of the National Academy of Sciences of the United States of America* **101**, 9786-9791, doi:10.1073/pnas.0402521101 (2004).
- 11 Boguslawski, K. M. *et al.* Exploiting species specificity to understand the tropism of a human-specific toxin. *Sci Adv* **6**, eaax7515, doi:10.1126/sciadv.aax7515 (2020).
- 12 DuMont, A. L. *et al.* *Staphylococcus aureus* elaborates leukocidin AB to mediate escape from within human neutrophils. *Infection and immunity* **81**, 1830-1841, doi:10.1128/IAI.00095-13 (2013).
- 13 DuMont, A. L. *et al.* *Staphylococcus aureus* LukAB cytotoxin kills human neutrophils by targeting the CD11b subunit of the integrin Mac-1. *Proceedings of the National Academy of Sciences of the United States of America* **110**, 10794-10799, doi:10.1073/pnas.1305121110 (2013).
- 14 Osicka, R. *et al.* Bordetella adenylate cyclase toxin is a unique ligand of the integrin complement receptor 3. *Elife* **4**, e10766, doi:10.7554/eLife.10766 (2015).
- 15 Monk, I. R., Shah, I. M., Xu, M., Tan, M. W. & Foster, T. J. Transforming the untransformable: application of direct transformation to manipulate genetically *Staphylococcus aureus* and *Staphylococcus epidermidis*. *MBio* **3**, doi:10.1128/mBio.00277-11 (2012).
- 16 Campeau, E. *et al.* A versatile viral system for expression and depletion of proteins in mammalian cells. *PLoS One* **4**, e6529, doi:10.1371/journal.pone.0006529 (2009).
- 17 Schoggins, J. W. *et al.* A diverse range of gene products are effectors of the type I interferon antiviral response. *Nature* **472**, 481-485, doi:10.1038/nature09907 (2011).



- 18 DuMont, A. L. *et al.* Identification of a crucial residue required for *Staphylococcus aureus* LukAB cytotoxicity and receptor recognition. *Infection and immunity* **82**, 1268-1276, doi:10.1128/IAI.01444-13 (2014).
- 19 Bryant, D. M. *et al.* A molecular network for de novo generation of the apical surface and lumen. *Nat Cell Biol* **12**, 1035-1045, doi:10.1038/ncb2106 (2010).
- 20 Sanjana, N. E., Shalem, O. & Zhang, F. Improved vectors and genome-wide libraries for CRISPR screening. *Nat Methods* **11**, 783-784, doi:10.1038/nmeth.3047 (2014).
