# Supplementary material
Source: PubMed Central journal article supplement (PMC8597016)

## Extended Data Figure 5B

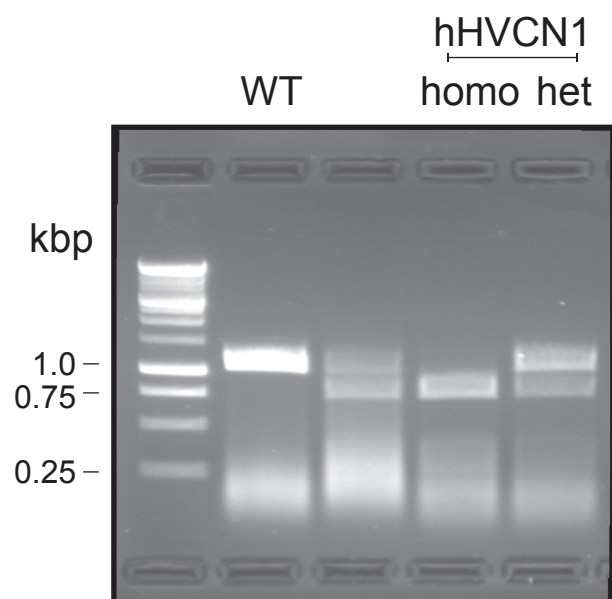

Supplement: NIHMS1682719-supplement-Source_data_Extended_Data_Figure_5B.pdf [file NIHMS1682719-supplement-Source_data_Extended_Data_Figure_5B.pdf]

**Figure 3D**

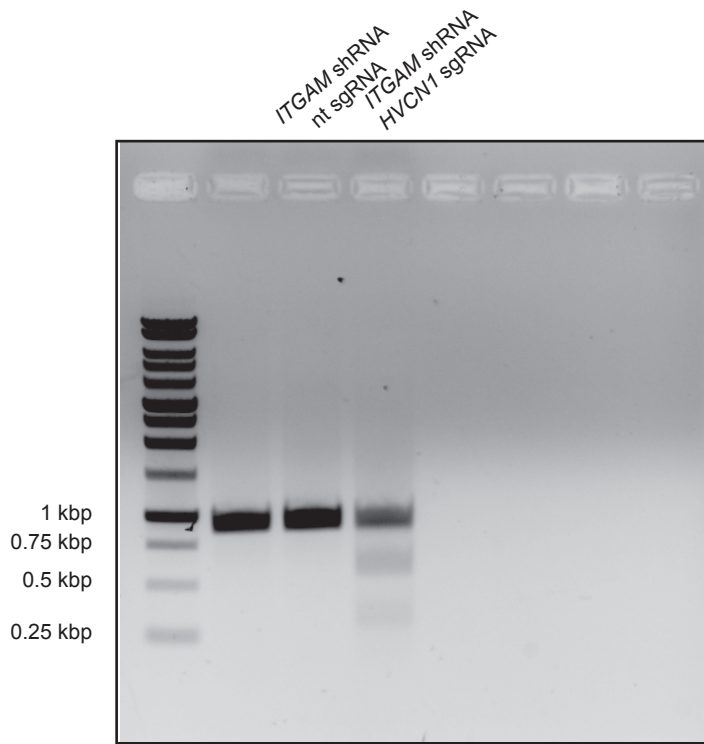

**Figure 3E**

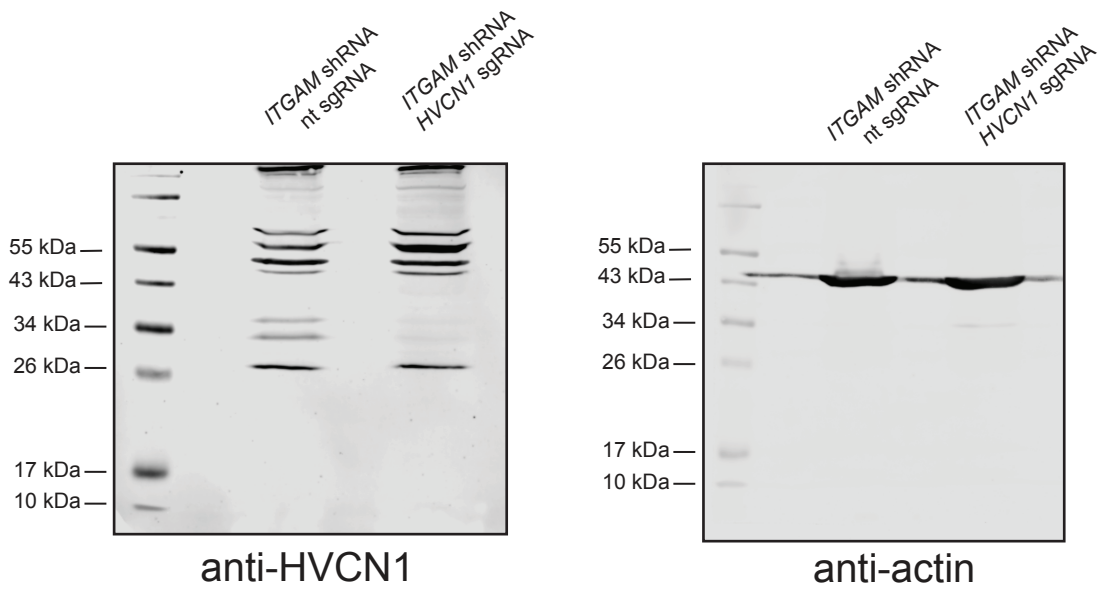

Supplement: NIHMS1682719-supplement-Source_data_Figure3DE.pdf [file NIHMS1682719-supplement-Source_data_Figure3DE.pdf]

**Figure 4A**

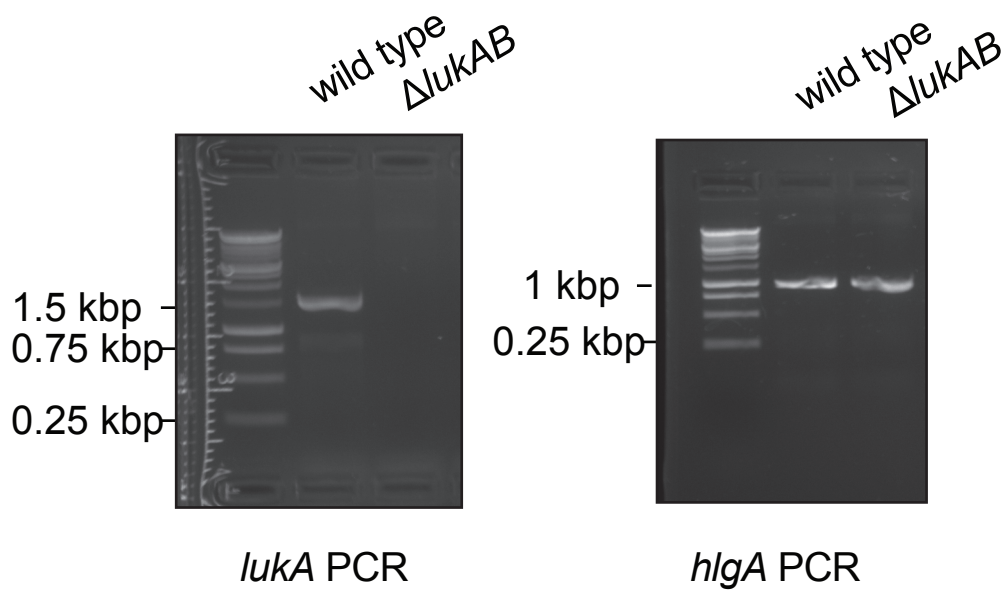

**Figure 4B**

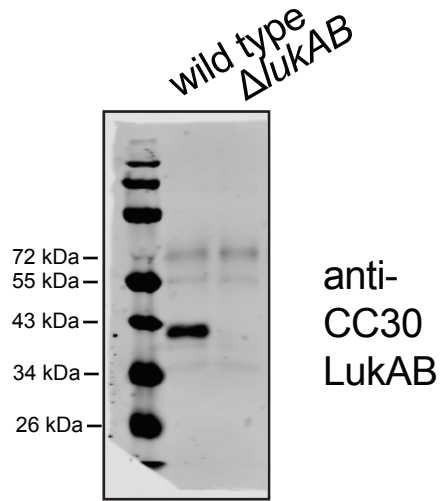

*S. aureus* 62300D1

Supplement: NIHMS1682719-supplement-Source_data_Figure4AB.pdf [file NIHMS1682719-supplement-Source_data_Figure4AB.pdf]

# Figure 5D

**Total protein**

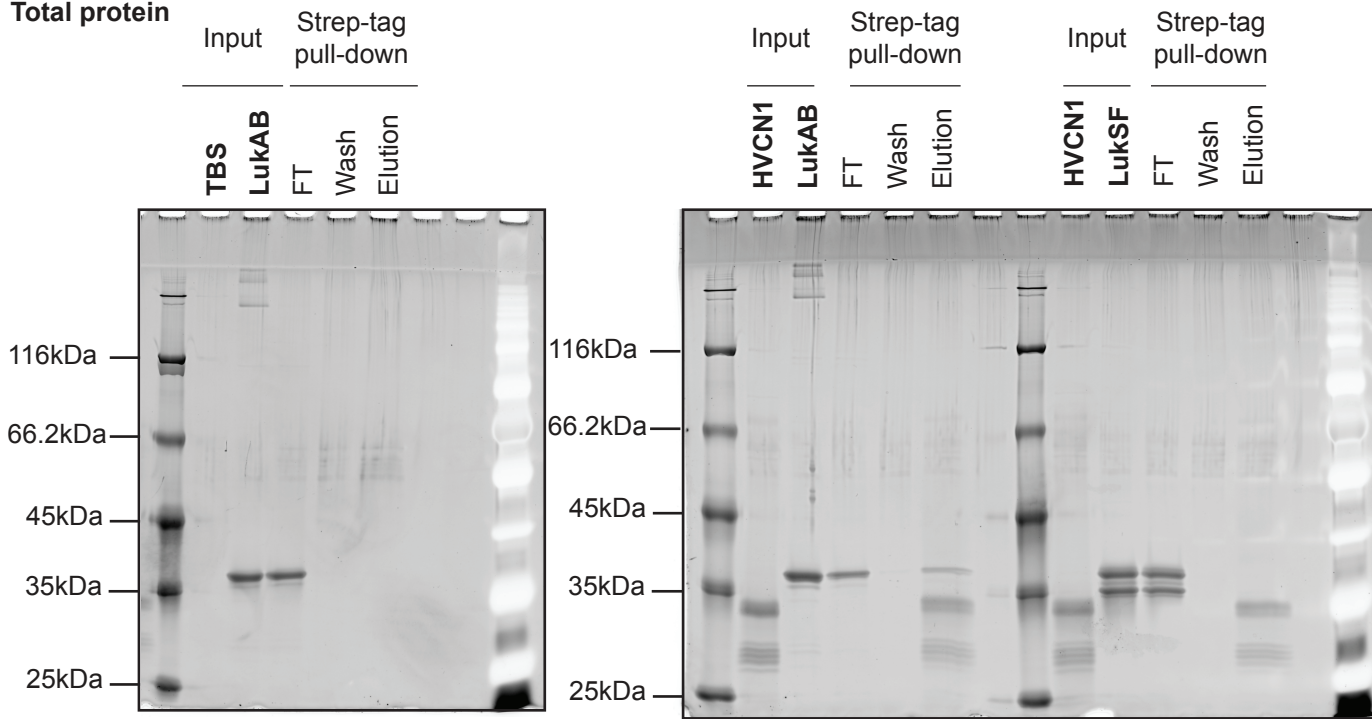

**anti-His**

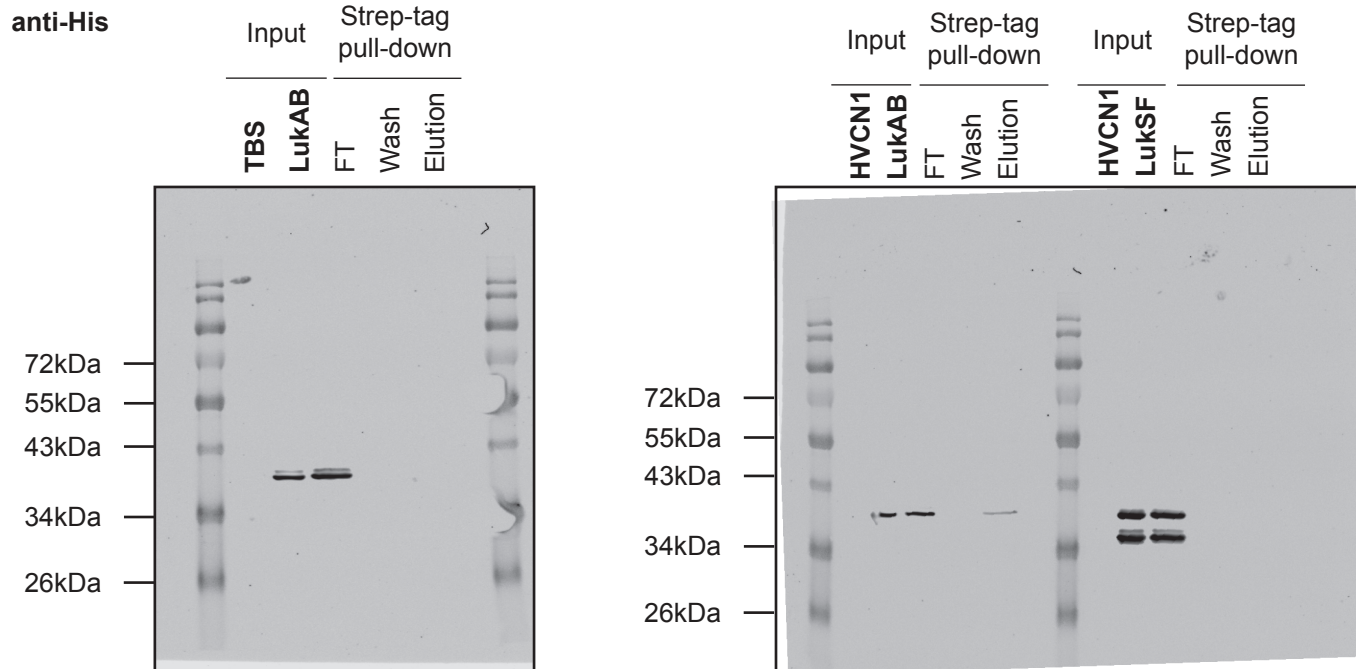

**anti-HVCN1**

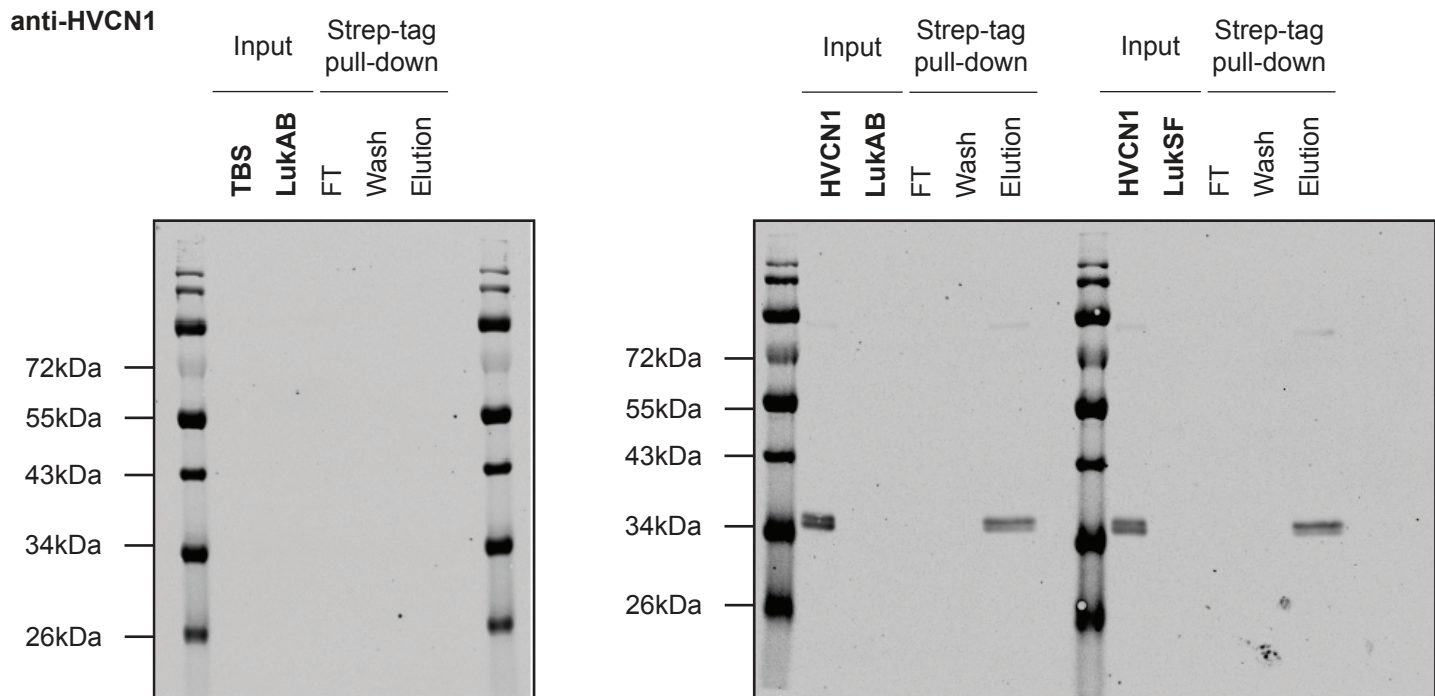

Supplement: NIHMS1682719-supplement-Source_data_Figure5D.pdf [file NIHMS1682719-supplement-Source_data_Figure5D.pdf]

**Figure 6B**

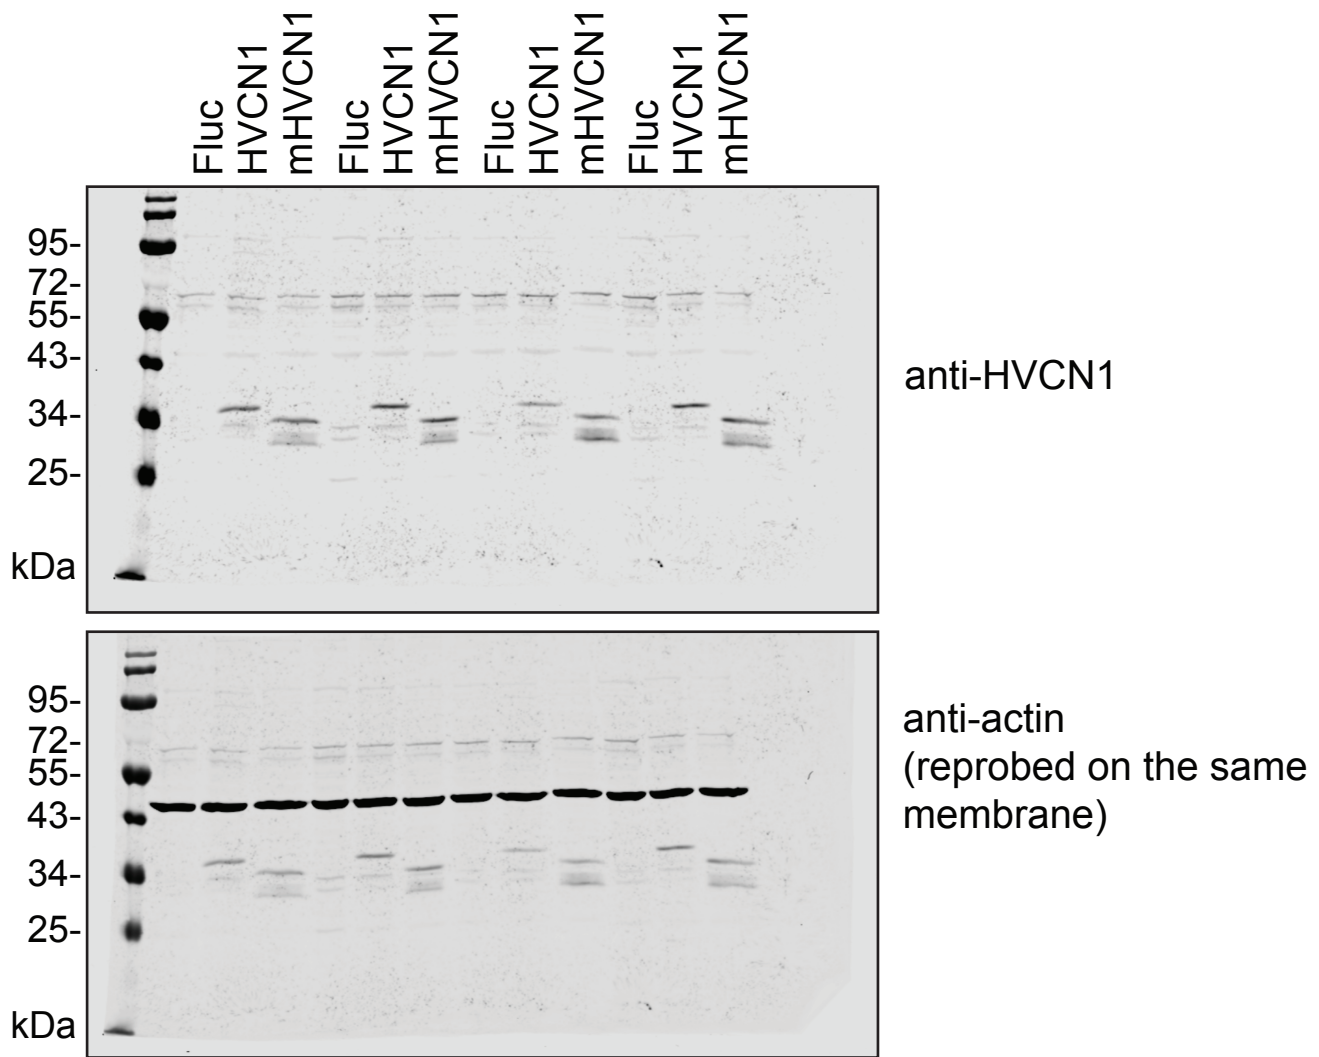

Supplement: NIHMS1682719-supplement-Source_data_Figure6B.pdf [file NIHMS1682719-supplement-Source_data_Figure6B.pdf]
